1 **Retention and predictors of attrition among patients who started antiretroviral therapy**  
2 **in Zimbabwe's National Antiretroviral Therapy Programme between 2012 and 2015**

3

4 Richard Makurumidze<sup>1,4,6¶</sup>, Tsitsi Mutasa-Apollo<sup>2¶</sup>, Tom Decroo<sup>4,5</sup>, Regis C. Choto<sup>2</sup>,  
5 Kudakwashe C. Takarinda<sup>2,7</sup>, Janet Dzangare<sup>2</sup>, Lutgarde Lynen<sup>4</sup>, Wim Van Damme<sup>4,6</sup>, James  
6 Hakim<sup>1</sup>, Tapuwa Magure<sup>3</sup>, Owen Mugurungi<sup>2</sup>, Simbarashe Rusakaniko<sup>1</sup>

7

8 1. College of Health Sciences, University of Zimbabwe, Harare, Zimbabwe

9 2. AIDS & TB Unit, Ministry of Health & Child Care, Harare, Zimbabwe

10 3. National AIDS Council, Harare, Zimbabwe

11 4. Institute of Tropical Medicine, Antwerp, Belgium

12 5. Research Foundation of Flanders, Brussels, Belgium

13 6. Gerontology, Faculty of Medicine & Pharmacy, Free University of Brussels (VUB),  
14 Brussels, Belgium

15 7. International Union Against Tuberculosis and Lung Disease, Paris, France.

16

17 \* **Corresponding Author:** Email: [rmakurumidze@ext.itg.be](mailto:rmakurumidze@ext.itg.be) (RM)

18 ¶ RM and TA are joint first authors.

19

## 20 **Abstract**

## 21 **Background**

22 The last evaluation to assess outcomes for patients receiving antiretroviral therapy (ART)  
23 through the Zimbabwe public sector was conducted in 2011, covering the 2007-2010 cohorts.  
24 The reported retention at 6, 12, 24 and 36 months were 90.7%, 78.1%, 68.8% and 64.4%,  
25 respectively. We report findings of a follow up evaluation for the 2012-2015 cohorts to assess  
26 the implementation & impact of recommendations from this prior evaluation.

## 27 **Methods**

28 A nationwide retrospective study was conducted in 2016. Multi-stage proportional sampling  
29 was used to select health facilities and study participants records. The data extracted from  
30 patient manual records included demographic, baseline clinical characteristics and patient  
31 outcomes (active on treatment, died, transferred out, stopped ART and lost to follow-up  
32 (LFTU)) at 6, 12, 24 and 36 months. The data were analysed using Stata/IC 14.2. Retention  
33 was estimated using survival analysis. The predictors associated with attrition were determined  
34 using a multivariate Cox regression model.

## 35 **Results**

36 A total of 3,810 participants were recruited in the study. The median age in years was 35 (IQR:  
37 28-42). Overall, retention increased to 92.4%, 86.5%, 79.2% and 74.4% at 6, 12, 24 and 36  
38 months respectively. LFTU accounted for 98% of attrition. Being an adolescent or a young  
39 adult (aHR 1.41; 95%CI:1.14-1.74), receiving care at primary health care facility (aHR 1.23;  
40 95%CI:1.01-1.49), having initiated ART between 2014-2015 (aHR 1.45; 95%CI:1.24-1.69),  
41 having WHO Stage 4 (aHR 2.06; 95%CI:1.51-2.81) and impaired functional status (aHR 1.24;  
42 95%CI:1.04-1.49) predicted attrition.

43

## 44 **Conclusion**

45 The overall retention was higher in comparison to the previous 2007–2010 evaluation. Further  
46 studies to understand why attrition was found to be higher at primary health care facilities are  
47 warranted. Implementation of strategies for managing patients with advanced HIV disease,  
48 differentiated care for adolescents and young adults and tracking of LFTU should be prioritised  
49 to further improve retention.

50

## 51 **Key words**

52 ART outcomes, implementation, low resource setting, differentiated care, Zimbabwe

53

54

## 55 **Introduction**

56 Globally by the end of 2018, there were 37.9 million [32.7 million–44.0 million] people living  
57 with HIV (PLHIV) with 61% of these residing in Eastern and Southern Africa (ESA) [1]. Over  
58 the past two to three decades, investments in the global HIV response have achieved  
59 unprecedented results with the number of new HIV infections significantly reduced from 2.9  
60 million [2.3 million–3.8 million] in 1997 to 1.7 million [1.6 million–2.3 million] new infections  
61 by 2018 and 23.3 million PLHIV put on treatment globally [1]. Between 2010 and 2018 new  
62 HIV infections and deaths decreased by 16% and 33%, respectively [2]. Despite these  
63 remarkable achievements, patient attrition and losses to follow-up (LTFU) still remain  
64 legitimate threats to the long-term success of antiretroviral therapy (ART) scale up [3].

65

66 PLHIV on ART who are not retained in care are at increased risk of developing drug resistance  
67 and dying [4]. Based on a systematic review of several studies that have been conducted in low  
68 resource settings, key predictors of high attrition include patients with advanced HIV-disease  
69 progression [marked by body mass index (BMI) <18 kg/m<sup>2</sup>, baseline CD4 counts <200  
70 cells/mL, World Health Organisation (WHO) Stage - III and IV, poorer level of functionality],  
71 male sex, younger age and having lower levels of education [5]. Early ART initiation as  
72 measured by shorter time duration between HIV testing and ART initiation has been shown to  
73 reduce risk of attrition[6,7]. Other studies have however shown that those who initiate ART at  
74 a higher baseline CD4 may also be prone to attrition [8,9].

75

76 Numerous studies assessed attrition and the effect of different initiatives on treatment outcomes  
77 at selected health facilities in resource-limited settings [7,8,10–12]. They mainly reflect the  
78 experience of academic, standalone, donor supported or private institutions that generally have  
79 better data collection systems, are well financed and have better human resources for health,

80 which may not be generalizable. In scenarios where outcomes for routine programmes have  
81 been reported, evaluations have often been regional, limited to a few facilities or targeting only  
82 a specific subpopulation of the HIV cohorts (children, adolescents or adults) [6,13–17]. There  
83 is paucity of data demonstrating treatment outcomes and impact of ART at a national level in  
84 many resource-limited settings. Periodic national treatment outcome evaluations provide  
85 information needed for targeted interventions that will allow national HIV programmes to  
86 achieve the ambitious UNAIDS 3<sup>rd</sup> 90 by 2020.

87

88 Zimbabwe started rolling out ART in the public health system in 2004 in 5 pilot facilities. Since  
89 then, there has been significant scale-up with more than 1500 health institutions offering ART  
90 by the end of 2017 [18]. This rapid scale-up has been mostly attributed to the rapid adaptation  
91 of the WHO HIV guidelines and the widespread decentralization of comprehensive HIV  
92 services which was supported by health care worker task-shifting policies and significant  
93 investments in training, supportive supervision and clinical mentoring [19]. Funding from the  
94 Government of Zimbabwe, Global Fund for AIDS, Tuberculosis, and Malaria (GFATM), the  
95 United States of America President’s Emergency Plan for AIDS Relief (PEPFAR) and other  
96 donors supported the scale-up the program.

97

98 An evaluation of the Zimbabwe national ART programme, which only included adults (> 15  
99 years) living with HIV started on ART between 2007-2010, reported 90.7%, 78.1%, 68.8% and  
100 64.4% retention at 6, 12, 24 and 36 months, respectively [17]. These findings mirrored  
101 treatment outcomes in other parts of sub-Saharan Africa and recommendations given included  
102 strengthening earlier diagnosis and linkages to treatment; further decentralization of  
103 comprehensive HIV services to improve ART coverage and adaptation of innovative strategies

104 aiming at improving patient retention (adherence clubs, food supplementation and mobile short  
105 messages service (SMS) reminders) [17].

106 In our study, we report results of a 2016 follow-up evaluation of treatment outcomes of the  
107 Zimbabwe National ART Programme, conducted among individuals who started ART between  
108 2012-2015, prior to the implementation of the HIV ‘Treat All’ policy. This nationwide follow-  
109 up evaluation therefore assessed the impact of the interventions implemented since the first  
110 evaluation. The assessment was expanded to include children and adolescents and was aiming  
111 to determine retention and estimate risk factors associated with attrition among the different  
112 population target groups.

113

## 114 **Material & Methods**

### 115 **Study design**

116 A retrospective cohort analysis was undertaken among children, adolescents and adults living  
117 with HIV who started ART in Zimbabwe between October 2012 and January 2015.

118

### 119 **Study setting**

120 The study was conducted at selected public health institutions across all the country's 10  
121 provinces. Zimbabwe has a population of around 13 million [20]. The country has a generalised  
122 HIV epidemic and prevalence has continued to hover between 13 % and 16 % for the past  
123 decade. Currently there are about 1.4 million PLHIV of which 1.0 million (71%) were on  
124 (ART) by December 2018 [18]. Since 2004 the country has adopted all the successive changes  
125 in the WHO recommendations to start ART. Patients were eligible to start ART when they had  
126 a CD4 count <350 cells/mL in 2010, CD4 <500 cells/mL in 2013 and since 2016, patients are  
127 eligible regardless of their CD4 count (Treat All). The country has made significant progress  
128 towards achieving the 90-90-90 targets. In a recent survey, 74.2% reported knowing their HIV  
129 status; 86.8% self-reported current use of ART and among those who self-reported current use  
130 of ART, 86.5 % were virally suppressed [21].

131

132 During the period between 2011 and 2015, the Zimbabwe National AIDS Strategic Plan II  
133 (ZNASP-II) 2011-15 was developed to guide the scale-up of HIV care and treatment services  
134 towards universal access [22]. In 2013, the country adopted the 2013 WHO guidelines which  
135 recommended the CD4 < 500 cells/mL threshold for ART initiation. A 'test and treat' approach  
136 was adopted for all HIV-positive children under 5 years, TB/HIV co-infected, HBV/HIV co-  
137 infected, the HIV-positive partner in HIV sero-discordant relationship and pregnant and

138 breastfeeding mothers (Option B+). The preferred first-line regimen for adults, adolescents,  
139 and older children was changed from stavudine, lamivudine and nevirapine (d4T/3TC/NVP)  
140 to a once-daily pill of tenofovir, lamivudine and efavirenz (TDF/3TC/EFV) with zidovudine  
141 and nevirapine as alternatives for TDF and EFV respectively. After ART initiation stable  
142 patients were reviewed every 3 months and drugs were dispensed directly from the health  
143 facilities. Monitoring was mainly clinical (weight, WHO clinical stage and assessment of  
144 opportunistic infections) at every visit, complemented with laboratory tests (CD4 testing) every  
145 6 months. Compared to the previous period access to CD4 testing improved significantly. By  
146 the end of 2015, laboratory based CD4 testing was available in each of the 63 districts as  
147 compared to 47 in 2009 [23]. On top of laboratory based CD4 testing, more than 265 point of  
148 care (POC) CD4 testing devices were procured and distributed throughout the country mainly  
149 to support the roll out of Option B+ [24]. Blood collection and transportation systems were put  
150 in place to support facilities without access to CD4 testing. Routine viral load testing was not  
151 available in the public sector and there was limited access to targeted viral load testing for  
152 patients with suspected treatment failure. The monitoring and evaluation system was mainly  
153 paper based. A few high-volume facilities started to implement an electronic patient monitoring  
154 system (ePMS) which operated concurrently with the usual paper-based system.

155

## 156 **Sample size and sampling criteria**

157 A minimum sample of 4000 patient charts was required to estimate 12-month ART retention  
158 (the outcome of interest), after assuming: 50% ART retention at 12 months after initiation, 20%  
159 of charts would be missing, a margin of error of 5% and a design effect of 2.0. For logistical  
160 and financially feasibility purposes, sampling was restricted to 1,389 ART sites across all 10  
161 provinces that were supporting  $\geq 50$  HIV-positive clients on ART for at least 12 months by  
162 January 2016. The sites were stratified into seven strata according to their patient volumes



163 receiving ART care and ordered by province and district within each stratum. From these, 70  
164 (5%) ART sites were sampled using a probability proportional to size sampling criteria based  
165 on client volumes receiving ART at each site. At the sampled sites, a line-listing was generated  
166 in Excel for all HIV positive children, adolescents, adults and pregnant women initiated on  
167 ART at the sampled sites between 1 October 2012 and 31 January 2015 using their unique ART  
168 numbers obtained from the facility ART register. Following this, the required number of patient  
169 ART care booklets were randomly selected without replacement according to their stratum  
170 based on random schedule generator in Stata. If a selected ART care booklet was not traceable,  
171 the next record was traced until the required sample size by site was reached

172

173

## 174 **Study variables and treatment outcomes**

175 The data collected included demographics (age, sex and marital status), clinical and  
176 programmatic variables. Baseline clinical parameters collected at point of ART initiation  
177 included WHO stage, functional status and pregnancy. Programmatic data collected included  
178 level of care, date of HIV testing, date of enrolment and date of ART initiation. Date of last  
179 clinic visit, date of next scheduled clinic visit and date of transfer-out/death/stopping ART were  
180 also collected and used determine ART outcomes (i.e. active on treatment, LTFU, dead,  
181 transferred out and stopped ART). The date the patient outcome was ascertained was also  
182 collected. Patients were considered LTFU if they were more than 180 days without visit at the  
183 clinic on the date of data abstraction.

184

## 185 **Data Collection Procedures**

186 Ten teams of three data abstractors collected the data using a structured tool. The data

187 abstractors underwent a 5-day training programme to acquaint them with study tools and study  
188 procedures. Data collection tools were piloted to identify weaknesses which then were  
189 rectified. The primary source document for the study was the patient manual medical records  
190 (Patient OI/ART Booklets) being kept at the health institution. Other sources to complement  
191 or validate the information included the different registers and interviews with at least one  
192 experienced health care worker at each sampled site. Data was collected using Open Data Kit  
193 (ODK) software on Android devices. Data was downloaded at regular intervals for cleaning,  
194 quality control checks, merging and backing up. Data from a sample of 10% of the selected  
195 charts was re-abstracted as a quality control check measure. Discrepancies were addressed by  
196 both the team leader and data abstractors.

197

## 198 **Data Analysis**

199 The data were analysed using Stata/IC 14.2 [25]. The primary outcome was attrition, and this  
200 was defined as either being dead, LTFU or stopped ART. A Cox proportional hazard model  
201 was used to compute crude and adjusted hazard ratios and their 95% confidence intervals  
202 estimating the association between explanatory variables and attrition. Time to attrition was  
203 calculated as the time between the date of ART initiation and the date of outcome or last patient  
204 clinic visit. Those active on ART and transferred out were censored on the date of data  
205 abstraction and the date they were transferred out. Kaplan–Meier techniques were used to  
206 estimate retention on ART at 6, 12, 24 and 36 months. The retention at 6, 12, 24 and 36 months  
207 for adults (> 15years) was compared with the prior evaluation and two-sample test of  
208 proportions was used to assess if there was a difference. The log rank test was used to assess if  
209 differences between survival curves were statistically significant. A hierarchical approach was  
210 employed where all variables associated with P-value <0.1 in the univariable were included

211 initially in the multivariable model. A stepwise backward elimination until all remaining  
212 variables were significantly associated with attrition (p-value < 0.05).

213

## 214 **Ethical Considerations**

215 The evaluation protocol received ethics approval from Medical Research Council of Zimbabwe  
216 (MRCZ/A/2033). The protocol was also sanctioned by the MoHCC. Confidentiality and  
217 anonymity of ART clients was protected use their unique ART numbers as no names were  
218 abstracted. Permission to conduct the evaluation was sought at various levels of the tiered  
219 health delivery system. All data abstractors signed confidentiality forms.

220

## 221 Results

222

223 A total of 3,993 (99.8%) records were abstracted out of a target of 4,000. On data cleaning  
224 3,810 (95.4%) records were found to be of quality standard for the analysis (Fig 1)

225

### 226 Fig 1. Study Population

227 Of 3,810 patients included, 38.7% and 48.6% started ART in 2013 and 2014, respectively, and  
228 59.4% were female. The median age in years was 35 [interquartile range (IQR):28-42]. Most  
229 patients were adults (71.8 %), married (55.8%), and had a normal functional status (73.4%).  
230 Few (3.1%) were in WHO stage IV, and 27.1% started ART at a primary health care (PHC)  
231 facility. Among women of child bearing age 10.4% reported to be pregnant at time of ART  
232 initiation, 5.5% of the total study population (Table1).

233

234 **Table 1. Baseline characteristics of 3810 patients who started ART between 2012-2015,**  
235 **in Zimbabwe**

|                                         | N            | (%)    |
|-----------------------------------------|--------------|--------|
| <b>Total</b>                            | 3810         | 100.0  |
| <b>Year of ART initiation</b>           |              |        |
| 2012                                    | 289          | (7.6)  |
| 2013                                    | 1476         | (38.7) |
| 2014                                    | 1850         | (48.6) |
| 2015                                    | 195          | (5.1)  |
| <b>Sex</b>                              |              |        |
| Female                                  | 2262         | (59.4) |
| Male                                    | 1548         | (40.6) |
| <b>Median Age (N=3700) (IQR)</b>        | 35 (28 - 42) |        |
| <b>Age groups</b>                       |              |        |
| Children (0-15 years)                   | 254          | (6.7)  |
| Adolescents & young adults (15-24years) | 385          | (10.1) |
| Adults (25-49 years)                    | 2735         | (71.8) |
| Elderly (>=50 years)                    | 424          | (11.1) |
| Missing                                 | 12           | (0.3)  |
| <b>Pregnancy at ART initiation</b>      |              |        |
| Confirmed                               | 208          | (5.5)  |
| Not confirmed                           | 3602         | (94.5) |
| <b>Marital status of patient</b>        |              |        |
| Single & divorced                       | 863          | (22.7) |
| Married                                 | 2125         | (55.8) |
| Widowed                                 | 434          | (11.4) |

|                                   |      |        |
|-----------------------------------|------|--------|
| N/A Child                         | 318  | (8.3)  |
| Missing                           | 70   | (1.8)  |
| <b>Baseline Functional Status</b> |      |        |
| Impaired                          | 811  | (21.3) |
| Normal                            | 2796 | (73.4) |
| Missing                           | 203  | (5.3)  |
| <b>Baseline WHO Stage</b>         |      |        |
| WHO Stage I                       | 821  | (21.5) |
| WHO Stage II                      | 1245 | (32.7) |
| WHO Stage III                     | 1447 | (38.0) |
| WHO Stage IV                      | 120  | (3.1)  |
| Unknown                           | 177  | (4.6)  |
| <b>Level of Care</b>              |      |        |
| Central Hospital                  | 888  | (23.3) |
| Provincial Hospital               | 341  | (9.0)  |
| Mission/District Hospitals        | 1549 | (40.7) |
| Primary Health Care facilities    | 1032 | (27.1) |

N - Number of observations, ART - Antiretroviral Therapy, IQR - Interquartile Range, N/A - Not applicable, WHO - World Health Organisation,

236

237 Fig 2 shows that the proportion of patients receiving ART at PHC facilities increased gradually  
238 from 21.6% in 2012 to 34.5% in 2015.

239

240 **Fig 2. Level of care where the 3,810 patients started ART between 2012-2015, in**  
241 **Zimbabwe**

242

243 Fig 3 shows that retention was significantly lower among patients who started ART between  
244 2014-2015 as compared to those who started between 2012-2013 period (log-rank test:  
245  $p < 0,001$ ).

246

247 **Fig 3. Comparison of retention rates of 3,810 patients who started antiretroviral therapy**  
248 **between 2012-2013 and 2014-2015 in Zimbabwe**

249 Overall, retention at 6, 12, 24 and 36 months was 92.4%, 86.5%, 79.2% and 74.4%, respectively. Table 2 shows a comparison between adult  
 250 patients who started ART between 2007-2010 and 2012-2015. Retention at 6, 12, 24 and 36 months was 1.4%, 10.0%, 14.3% and 14.5% higher  
 251 among patients who started between 2012-2015. Differences were statistically significant except at 6 months.

252 **Table 2. Retention in care of patients who started antiretroviral therapy between 2007-2010 and 2012-2015 in Zimbabwe**

|                     | Months since ART initiation | 2012-2015 Evaluation |               |               | 2007-2010 Evaluation |               |               | Difference |               |                      |
|---------------------|-----------------------------|----------------------|---------------|---------------|----------------------|---------------|---------------|------------|---------------|----------------------|
|                     |                             | N                    | Retention (%) | 95% CI        | N                    | Retention (%) | 95% CI        | %          | 95%CI         | <sup>a</sup> P value |
| Overall             | 6                           | 3476                 | 92.4          | (91.5 – 93.2) |                      |               |               |            |               |                      |
|                     | 12                          | 3066                 | 86.5          | (85.3 – 87.5) |                      |               |               |            |               |                      |
|                     | 24                          | 1427                 | 79.2          | (77.7 – 80.6) |                      |               |               |            |               |                      |
|                     | 36                          | 222                  | 74.4          | (72.5 – 76.1) |                      |               |               |            |               |                      |
| Children < 15 years | 6                           | 250                  | 97.3          | (94.4 – 98.7) |                      |               |               |            |               |                      |
|                     | 12                          | 230                  | 94.2          | (90.5 – 96.4) |                      |               |               |            |               |                      |
|                     | 24                          | 114                  | 86.3          | (81.0 – 90.2) |                      |               |               |            |               |                      |
|                     | 36                          | 17                   | 82.3          | (75.5 – 87.4) |                      |               |               |            |               |                      |
| Adults > 15 years   | 6                           | 3222                 | 92.0          | (91.1 – 92.9) | 3739                 | 90.7          | (86.1 – 93.8) | 1.4        | (-0.02 – 2.6) | 0.06                 |
|                     | 12                          | 2832                 | 85.9          | (84.7 – 87.0) | 3641                 | 78.1          | (67.7 – 84.7) | 10.0       | (5.9 – 10.0)  | <0.001               |
|                     | 24                          | 1311                 | 78.7          | (77.1 – 80.1) | 2003                 | 68.8          | (58.5 – 77.5) | 14.3       | (6.9 – 12.9)  | <0.001               |
|                     | 36                          | 204                  | 73.7          | (71.8 – 75.6) | 806                  | 64.4          | (55.7 – 72.3) | 14.5       | (2.4 – 16.2)  | <0.001               |

<sup>a</sup>Two-sample test of proportions

253

254

255

256

257 Over 6,508 years of patient follow up; 77.4% were active on treatment, 2.4% transferred out and 20.2% were lost through attrition (LTFU 19.8 %,  
 258 and died 0.4%) The median follow-up time per patient was 1.7 years IQR (1.1-2.4). The overall attrition rate was 11.8, [95% confidence interval  
 259 (CI):11.0-12.7] per 100 person years (PY). The other attrition rates are shown in Table 3.

260 **Table 3. Bivariate and multivariate analysis of factors associated with attrition in the 2012-2015 ART cohort**

| Variable                   | Categories                   | Total       | PT years    | Attrition <sup>§</sup> | Attrition % | Attrition Per 100PY | HR          | p                | 95%CI                | aHR         | P                | 95%CI                |
|----------------------------|------------------------------|-------------|-------------|------------------------|-------------|---------------------|-------------|------------------|----------------------|-------------|------------------|----------------------|
| <b>Total</b>               |                              | <b>3810</b> | <b>6508</b> | <b>768</b>             | <b>20.2</b> | <b>11.8</b>         |             |                  |                      |             |                  |                      |
| Sex                        | Female                       | 2262        | 3793        | 440                    | 19.5        | 11.6                | 1           |                  |                      |             |                  |                      |
|                            | Male                         | 1548        | 2689        | 328                    | 21.2        | 12.2                | 1.06        | 0.4              | (0.92 - 1.23)        |             | NS               | NS                   |
| Age group                  | Adults                       | 2735        | 4664        | 555                    | 20.3        | 11.9                | 1           |                  |                      | 1           |                  |                      |
|                            | Children                     | 254         | 467         | 35                     | 13.8        | 7.5                 | <b>0.62</b> | <b>0.006</b>     | <b>(0.44 - 0.87)</b> | 0.62        | 0.007            | (0.44 - 0.88)        |
|                            | Adolescents & young adults   | 385         | 563         | 103                    | 26.8        | 18.3                | <b>1.47</b> | <b>&lt;0.001</b> | <b>(1.19 - 1.82)</b> | <b>1.41</b> | <b>0.002</b>     | <b>(1.14 - 1.74)</b> |
|                            | Elderly                      | 424         | 781         | 75                     | 17.7        | 9.6                 | 0.81        | 0.1              | (0.64 - 1.04)        | 0.83        | 0.1              | (0.65 - 1.05)        |
|                            | Missing                      | 12          |             | 0                      | 0.0         | 0.0                 |             |                  |                      |             |                  |                      |
| Marital Status             | Married                      | 2125        | 3612        | 419                    | 19.7        | 11.6                | 1           |                  |                      |             |                  |                      |
|                            | Single & divorced            | 863         | 1384        | 202                    | 23.4        | 14.6                | <b>1.25</b> | <b>0.01</b>      | <b>(1.05 - 1.47)</b> |             |                  |                      |
|                            | Widowed                      | 434         | 773         | 85                     | 19.6        | 11.0                | 0.97        | 0.8              | (0.76 - 1.22)        |             | NS               | NS                   |
|                            | Child N/A                    | 318         | 583         | 49                     | 15.4        | 8.4                 | 0.74        | 0.4              | (0.55 - 0.99)        |             |                  |                      |
|                            | Missing                      | 70          | 133         | 13                     | 18.6        | 9.8                 | 0.88        | 0.6              | (0.51 - 1.53)        |             |                  |                      |
| Level of Care              | Central & province           | 1229        | 2110        | 230                    | 18.7        | 10.9                | 1           |                  |                      | 1           |                  |                      |
|                            | Primary health care facility | 1032        | 1664        | 213                    | 20.6        | 12.8                | <b>1.15</b> | <b>0.1</b>       | <b>(0.96 - 1.39)</b> | <b>1.23</b> | <b>0.04</b>      | <b>(1.01 - 1.49)</b> |
|                            | District                     | 1549        | 2708        | 325                    | 21.0        | 12.0                | 1.10        | 0.2              | (0.93 - 1.31)        | <b>1.21</b> | <b>0.04</b>      | <b>(1.01 - 1.44)</b> |
| Year ART Initiation        | 2012-13                      | 1765        | 4011        | 377                    | 21.4        | 9.4                 | 1           |                  |                      | 1           |                  |                      |
|                            | 2014-2015                    | 2045        | 2490        | 391                    | 19.1        | 15.7                | <b>1.45</b> | <b>&lt;0.001</b> | <b>(1.24 - 1.69)</b> | <b>1.45</b> | <b>&lt;0.001</b> | <b>(1.24 - 1.69)</b> |
| WHO Stage                  | I-III                        | 3513        | 5921        | 675                    | 19.2        | 11.4                | 1           |                  |                      | 1           |                  |                      |
|                            | IV                           | 120         | 194         | 43                     | 35.8        | 22.2                | <b>1.95</b> | <b>&lt;0.001</b> | <b>(1.43 - 2.66)</b> | <b>2.06</b> | <b>&lt;0.001</b> | <b>(1.51 - 2.81)</b> |
|                            | Missing                      | 177         | 350         | 50                     | 28.2        | 14.3                | 1.34        | 0.05             | (1.00 - 1.78)        | 1.52        | 0.04             | (1.02 - 2.27)        |
| Functional status          | Normal                       | 2796        | 4761        | 538                    | 19.2        | 11.3                | 1           |                  |                      | 1           |                  |                      |
|                            | Impaired                     | 811         | 1321        | 177                    | 21.8        | 13.4                | 1.18        | 0.06             | (0.99 - 1.40)        | <b>1.24</b> | <b>0.02</b>      | <b>(1.04 - 1.49)</b> |
|                            | Missing                      | 203         | 396         | 53                     | 26.1        | 13.4                | 1.26        | 0.1              | (0.95 - 1.67)        | 1.01        | 0.9              | (0.69 - 1.50)        |
| Pregnant when starting ART | Not confirmed                | 3602        | 6243        | 718                    | 19.9        | 11.5                | 1           |                  |                      |             |                  |                      |
|                            | Confirmed                    | 208         | 270         | 50                     | 24.0        | 18.5                | <b>1.48</b> | <b>0.007</b>     | <b>(1.12 - 1.98)</b> |             | NS               | NS                   |

NS= Not significant; HR= Hazard Ratio; aHR=adjusted Hazard Ratio; CI= Confidence Interval; ART= Antiretroviral Therapy; WHO= World Health Organisation  
 § either death or LTFU

262 On bivariate analysis, being an adolescent or a young adult [hazard ratio (HR) 1.47; 95%  
263 CI:1.19-1.82], being single or divorced (HR 1.25; 95 CI:1.05-1.47), having initiated ART  
264 between 2014-2015 (HR 1.45; 95% CI:1.24-1.69), having WHO Stage 4 (HR 1.95; 95%  
265 CI:1.43-2.66) , and being pregnant at time of ART initiation (HR 1.48; 95% CI:1.12-1.98) were  
266 associated with attrition ( $p<0.05$ ). Risk of attrition among children (<15years) was 40% lower  
267 as compared to adults. In addition, being elderly (HR 0.81; 95%CI:0.64-1.04) and receiving  
268 care at PHC facility (HR 1.15; 95%CI:0.96-1.39) were associated at level 0.1 and included in  
269 the multivariable regression model.

270

271 In multivariable analysis, being an adolescent or a young adult [multivariable-adjusted hazard  
272 ratio (aHR)1.41; 95% CI:1.14-1.74], receiving care at PHC facility and district level (aHR 1.23;  
273 95% CI:1.01-1.49) and (aHR 1.21; 95% CI:1.01-1.44), having initiated ART between 2014-  
274 2015 (aHR 1.45; 95% CI:1.24-1.69), having WHO Stage 4 (aHR 2.06; 95% CI:1.51-2.81), and  
275 having an impaired functional status (aHR1.24; 95% CI:1.04-1.49) were associated with  
276 attrition (Table 3).

277

278



## 279 **Discussion**

280 This follow-up evaluation of the Zimbabwe National ART programme, which included  
281 children, adolescents and adults started on ART between 2012 and 2015, showed an overall  
282 improvement of the performance of the ART programme compared to those started on ART  
283 between 2007-2010 [17]. Attrition was mainly explained LTFU. Retention observed in this  
284 evaluation was above what is reported for children, adolescents and adults in other similar  
285 studies from low resource settings [26–28]. Adolescents and young adults, patients with  
286 advanced HIV disease (WHO Stage 4, impaired functional status), those receiving care at PHC  
287 level and starting treatment after 2013, when the country switched treatment guidelines to the  
288 500 CD4 cells/mL threshold, were at risk of attrition.

289

290 The increase in retention since the previous evaluation may be explained by strategies put in  
291 place by the MoHCC. Relying on a vast body of evidence showing that decentralisation  
292 increases access to ART and retention in care [29], the prior evaluation recommended further  
293 decentralization. Moreover, other innovative strategies to improve patient retention, such as  
294 adherence clubs, food supplementation and mobile short messages service (SMS) reminders  
295 were recommended [17]. Our data show a substantial increase of the proportion of patients  
296 receiving ART at PHC level. This decentralization was supported by policy shifts (in particular,  
297 the provision for nurses to initiate ART in non-complicated cases), and by significant  
298 investments in training, supportive supervision and clinical mentoring [30]. In addition to  
299 decentralisation, the improvement in retention could also be attributed to adoption of WHO  
300 guidance for earlier ART initiation among those tested HIV-positive with CD4<500 cells/mL  
301 compared to the previous 350 cells/mL CD4 threshold. For instance in this cohort 41.1% had  
302 WHO stage 3 or 4 compared to 87.6% in the previous study [17]. However, other recommended  
303 measures, such as food supplementation, adherence clubs, mobile short messages service

304 (SMS) reminders, fast tracking of stable patients on ART, community and family ART refill  
305 groups, were not implemented on a wide scale in the public sector.

306

307 However, the increase of decentralized ART does probably not explain the higher level of  
308 retention, compared to the previous evaluation. Surprisingly, our study showed that receiving  
309 ART at PHC level was associated with attrition. This finding contrasts with the findings of the  
310 previous evaluation. In the previous evaluation, retention among patients receiving ART at  
311 PHC level was better than among those initiating ART at higher levels of care, in particular  
312 district/mission hospitals [17]. We speculate that the higher level of attrition in PHC facilities  
313 may be explained by the massive decentralisation (down referral), which happened during the  
314 current evaluation period, whereby patients who started ART at district/provincial hospitals  
315 were referred to PHC level for follow-up. Implementation of policy changes may be abrupt and  
316 have an adverse effect. After assessment by a healthcare worker, stable patients may have little  
317 or no opportunity to object against the decision to be referred to another clinic. Patients referred  
318 to a clinic which is not of their choice are more likely to self-transfer to another facility of their  
319 choice. Such patients are then considered as LFTU in one clinic, while retained in another  
320 clinic. Moreover, at the beginning of the decentralisation process, care at PHC level may not  
321 have been fully developed. Another study showed that abrupt down-referral may lead to a  
322 decrease in quality of care and resulting in worse health outcomes [31]. When PHC facilities  
323 are ill prepared, usually outcome monitoring is poor. The country has almost completed the  
324 decentralisation process for ART services and the focus now should be on improving the  
325 quality of care at PHC facilities. The necessary health system support structures which include  
326 human resources for health (recruitment, training and capacity building), drug supply,  
327 monitoring and evaluation should be prioritised.

328

329 Most of the reported attrition (98%) was due to LFTU. This finding was similar to the prior  
330 evaluation where LFTU also accounted for the larger proportion of attrition. Determining true  
331 LTFU is not always easy. A recent meta-analysis showed that, of patients LTFU and traced,  
332 30% had self-transferred, 30% had stopped taking ART and the other 30% had died [32]. We  
333 therefore hypothesize that the increased LTFU in our study might be administrative, especially  
334 at PHC level where monitoring is less well developed. A substantial proportion of patients may  
335 seem LTFU, but be in care at another or even the same clinic with another identification number  
336 [31]. The probability of administrative reasons for LTFU is probably higher at PHC facilities,  
337 especially when paper-based tools are used to monitor and report treatment outcomes [31].  
338 Poor documentation of clinic visits and transfers in medical records may result in  
339 administrative LTFU. There is need to determine the true nature of the outcome of patients  
340 LTFU within the Zimbabwe ART programme. A substantial proportion may be alive and  
341 receiving ART from another facility, while others may have died but were not reported as such  
342 [33,34]. This may be achieved through strengthening the current active patient tracking and  
343 tracing mechanisms [35]. The existing ART programme's electronic patient monitoring  
344 systems (ePMS) should also be scaled up and optimised to bring efficiency in patient  
345 monitoring [36]. Tracing mechanisms include SMS reminders, phone calls and home visits by  
346 community health workers [37].

347

348 There was a change in the risk factors for attrition in comparison to the previous evaluation.  
349 Males were at risk of attrition in the prior evaluation but were not risk in the current evaluation.  
350 Several studies have consistently showed males at high risk of attrition due to several reasons,  
351 including employment related constraints and poor health seeking behaviour leading to late  
352 presentation [13,15,38]. During the study period the country did not implement many specific  
353 interventions that targeted men. Decentralisation of ART services may have also worked in

354 favour of males for better retention as they could now access services at health facilities closer  
355 to where they reside. Another strategy that may have improved male ART uptake and retention  
356 was male involvement in PMTCT (Option B+), promoted during massive campaigns [19].  
357 There is a need for further studies to assess whether this strategy suffices, or if other strategies  
358 targeting men are needed, such as flexible clinic hours to accommodate work, community-  
359 based ART delivery, and tracing of those who miss appointments[39,40].

360

361 The previous evaluation did not include data on adolescents and young adults [17]. We found  
362 that adolescents and young adults were more at risk of attrition when compared to adults. Our  
363 findings are consistent with other studies [41–43]. Adolescents and young adults have been  
364 shown to be at high risk of attrition due to several factors, which include lack of youth-friendly  
365 services, rigid scheduling not taking into account schooling, and unavailability of peer  
366 caregivers [44,45]. Addressing these challenges can lead to improvement in the retention of  
367 adolescents and young adults on ART. Locally, community adolescent treatment supporters  
368 (CATS) have been shown to improve retention among adolescents and scaling up of the  
369 initiative should be prioritised [46].

370

371 We found patients with advanced disease to be at higher risk of attrition. Patients with advanced  
372 HIV disease are prone to attrition mainly due to mortality and morbidity. The common causes  
373 of morbidity and mortality in low resource setting include cryptococcal meningitis,  
374 tuberculosis, sepsis, malignancy and wasting syndrome/chronic diarrhoea [47–49]. Advanced  
375 HIV disease was also a risk factor for attrition in the previous evaluation. Very minimal  
376 investment in building capacity at primary health facilities in the management of patients with  
377 advanced HIV disease contributes to poorer outcomes in this subgroup. Indeed, access to  
378 baseline CD4 testing, screening and management of opportunistic (tuberculosis, cryptococcal

379 meningitis) and access to prophylaxis (isoniazid preventive therapy & pre-emptive  
380 fluconazole) remains a challenge in the Zimbabwe's public sector [50,51]. Recent evidence has  
381 also shown that screening, prophylaxis and management of opportunistic diseases (mainly  
382 tuberculosis, bacterial sepsis and cryptococcal disease) significantly reduce morbidity and  
383 mortality [52,53]. However, evidence from this enhanced care package is currently being  
384 poorly implemented by most ART programmes in low resource setting [54]. There is a need to  
385 mobilise resources for training and capacity building of health workers, setting up the necessary  
386 infrastructure and procurement of the necessary commodities required in the management of  
387 patients with advanced disease. However, the process should be guided by a formal assessment  
388 of the current burden of advanced disease in the country.

389

390 We also found that patients who started ART after 2013 to be at risk of attrition as compared  
391 to those who started prior. We speculate that this could be explained by the fact that patients  
392 were now starting ART at a higher CD4 count. In 2013, the country switched ART guidelines  
393 to the 500 CD4 cells per cubic millilitres threshold from the 350 cells per cubic millilitres cut-  
394 off which was used in 2012. On top of the change in the CD4 cut off point, test and treat was  
395 also introduced to specific sub-populations (children under 5 years, TB/HIV co-infected,  
396 HBV/HIV co-infected, the HIV-positive partner in HIV sero-discordant relationship and  
397 pregnant and breastfeeding mothers (Option B+). Similar findings were reported in previous  
398 studies, which showed that patients who started ART at a higher CD4 were at risk of  
399 attrition[8,9]. Patients starting ART at high CD4 are less sick and have low risk perception  
400 which might affect adherence to long term therapy [55]. This then calls for earnest  
401 implementation of the current country operational guidelines which recommends adequate  
402 psychosocial preparation and readiness assessment before ART initiation under Treat All [37].

403

404 Our study was a follow-up evaluation of the Zimbabwe ART programme. To our knowledge,  
405 no studies showing national data have been followed-up by a second study of similar  
406 magnitude. In a recent review, none of the studies included was a follow-up to a prior  
407 evaluation [5]. Despite the highlighted strengths our study had limitations. Most of the reported  
408 attrition was due to LTFU. Patients who are classified as LTFU might have been alive and still  
409 on ART (self-transferred), stopped ART or may have died [32]. Our LTFU definition (180  
410 without visit) differed from the one used by the program (LTFU = 90 days late), due to data  
411 availability. However, considering that patients received up to 3 months ART refill, both  
412 definitions would result in similar findings. Moreover, we could not report on immunologic  
413 and virologic patient outcomes due to missing information in the patient manual medical  
414 records. Information on viral load testing and CD4 testing was missing.

## 415 **Conclusion**

416 Zimbabwe's ART program shows good retention across different patient groups. The ART  
417 retention increased since the previous 2011 evaluation. However, adolescents and young  
418 adults, patients with advanced HIV disease (WHO Stage 4, impaired functional status),  
419 receiving care at PHC level and starting treatment after 2013 when the country switched  
420 treatment guidelines to the 500 CD4 cells per cubic millilitres threshold were at risk of attrition.  
421 From the findings we recommend research into the following areas: reasons for higher attrition  
422 at PHC facilities, feasibility of screening for advanced disease at primary health facilities and  
423 ensuring access to referral clinical care, assessing retention within levels of care, qualitative  
424 research to explore the causal link between attrition in recent years, and being less sick at the  
425 start of treatment. To improve monitoring electronic patient monitoring systems should be  
426 prioritised to aid patient tracking. There is also a need for differentiated care strategies for  
427 adolescents and young adults to improve retention. Creation of youth-friendly services, flexible

428 scheduling of visits and expansion of peer caregivers/treatment supporters should be  
429 considered.

## 430 **Acknowledgements**

431 The authors of the articles would like express gratitude and appreciation to the following  
432 organizations that made immense contributions and technical support to the success of this  
433 study namely the Ministry of Health and Child care, National AIDS Council (NAC), University  
434 of Zimbabwe College of Health Sciences (UZCHS) Department of Community Medicine,  
435 World Health Organization (WHO) and the Institute of Tropical Medicine (ITM), Antwerp,  
436 Belgium. The authors would like to appreciate those who participated in training, data  
437 abstraction, data cleaning, data entry and regular progress and review meetings during the  
438 study: Gerald Shambira, Rosemary Mhlanga-Gunda, Mutsa Mhangara, Angela Mushavi,  
439 Amon Mpofu, Brilliant Nkomo, Ngwarai Sithole, Isaac Taramusi, Joseph Murungu, Solomon  
440 Mukungunugwa and Christine C. Chakanyuka-Musanhu. We are particularly indebted to the  
441 MoHCC management at different levels for the support and permission to enter the respective  
442 sampled facilities. Finally, we thank the data abstraction teams, Open Data Kit support team,  
443 front line health workers and people living with HIV on ART whose records were reviewed.

444

## 445 **Authors Contributions**

446

---

| <b>Author</b>        | <b>Contribution</b>                                                                                               |
|----------------------|-------------------------------------------------------------------------------------------------------------------|
| Richard Makurumidze  | Conceptualization, Data curation, Formal analysis, Methodology, Validation, Writing – original draft preparation, |
| Tsitsi Mutasa-Apollo | Conceptualization, Data curation, Methodology, Project administration, Supervision, Writing – review & editing,   |
| Tom Decroo           | Conceptualization, Data curation, Validation, Formal analysis, Methodology, Writing – review & editing            |

---

---

|                         |                                                                                                                   |
|-------------------------|-------------------------------------------------------------------------------------------------------------------|
| Regis C. Choto          | Conceptualization, Data curation, Methodology, Project administration, Supervision, Writing – review & editing,   |
| Kudakwashe C. Takarinda | Conceptualization, Data curation, Formal analysis, Methodology, Validation, Writing – review & editing            |
| Janet Dzangare          | Conceptualization, Data curation, Formal analysis, Methodology, Validation, Writing – review & editing            |
| Lutgarde Lynen          | Conceptualization, Methodology, Writing – review & editing                                                        |
| Wim Van Damme           | Conceptualization, Methodology, Writing – review & editing                                                        |
| James Hakim             | Conceptualization, Methodology, Writing – review & editing                                                        |
| Tapuwa Magure           | Project administration, Supervision, Resources, Funding Acquisition                                               |
| Owen Mugurungi          | Project administration, Supervision, Resources, Funding Acquisition                                               |
| Simbarashe Rusakaniko   | Conceptualization, Data curation, Methodology, Data Analysis, Supervision, Validation, Writing – review & editing |

---

447

## 448 **Data Availability**

449 The study was conducted with routinely collected data of the Zimbabwe National ART  
450 Programme and anonymized individual patient level data. Permission to conduct the study and  
451 ethical clearance were obtained from the Ministry of Health & Child Care and the Medical  
452 Research Council of Zimbabwe. Permission was also sought to disseminate the results in  
453 relevant scientific forums. However, the data which was used to conduct is not available on the  
454 public domain and anyone interested in using the data for scientific purpose is free to request  
455 permission from the Director of the AIDS and TB Program, Dr Owen Mugurungi, Director of  
456 the AIDS and TB Program, AIDS and TB Unit, Ministry of Health and Child Care,  
457 Government of Zimbabwe, 2nd Floor, Mukwati Building, Harare, Zimbabwe. E-mail:  
458 [atp.director@ymail.com](mailto:atp.director@ymail.com)

## 459 **Funding**



460 The study was supported with funding from the Global Fund for AIDS, Tuberculosis, and  
461 Malaria (GFATM). The funders had no role in study design, data collection and analysis,  
462 decision to publish, or preparation of the manuscript. Richard Makurumidze receives a PhD  
463 scholarship grant from the Institute of Tropical Medicine, funded by the Belgian Development  
464 Cooperation.

465

## 466 **Competing Interests**

467 The authors declare that they have no competing interests.

468

## 469 **References**

- 470 1. The Joint United Nations Programme on HIV/AIDS (UNAIDS). UNAIDS Data 2019.  
471 2019.
- 472 2. The Joint United Nations Programme on AIDS (UNAIDS). Global HIV & AIDS  
473 statistics — 2019 fact sheet [Internet]. 2019. Available:  
474 <https://www.unaids.org/en/resources/fact-sheet>
- 475 3. Levi J, Raymond A, Pozniak A, Vernazza P, Kohler P, Hill A. Can the UNAIDS 90-  
476 90-90 target be achieved? A systematic analysis of national HIV treatment cascades.  
477 *BMJ Glob Heal.* 2016;1: e000010. doi:10.1136/bmjgh-2015-000010
- 478 4. Altice F, Evuarherhe O, Shina S, Carter G, Beaubrun AC. Adherence to HIV treatment  
479 regimens: systematic literature review and meta-analysis. *Patient Prefer Adherence.*  
480 2019;Volume 13: 475–490. doi:10.2147/PPA.S192735
- 481 5. Bulsara SM, Wainberg ML, Newton-John TRO. Predictors of Adult Retention in HIV

- 482 Care: A Systematic Review. *AIDS Behav.* 2018;22: 752–764. doi:10.1007/s10461-  
483 016-1644-y
- 484 6. Ugoji C, Okere N, Dakum P, Ake-uzoigwe R, Igboelina D, Ndembi N, et al. Correlates  
485 of Patient Retention in HIV Care and Treatment Programs in Nigeria. *Curr HIV Res.*  
486 2015; 300–307.
- 487 7. Janssen S, Wieten RW, Stolp S, Cremers AL, Rossatanga EG, Klipstein-Grobusch K,  
488 et al. Factors Associated with Retention to Care in an HIV Clinic in Gabon, Central  
489 Africa. *PLoS One.* 2015;10: e0140746. doi:10.1371/journal.pone.0140746
- 490 8. Charurat M, Oyegunle M, Benjamin R, Habib A, Eze E, Ele P, et al. Patient Retention  
491 and Adherence to Antiretrovirals in a Large Antiretroviral Therapy Program in  
492 Nigeria: A Longitudinal Analysis for Risk Factors. *PLoS One.* 2010;5: e10584.  
493 doi:10.1371/journal.pone.0010584
- 494 9. Stafford KA, Odafe SF, Lo J, Ibrahim R, Ehoche A, Niyang M, et al. Evaluation of the  
495 clinical outcomes of the Test and Treat strategy to implement Treat All in Nigeria:  
496 Results from the Nigeria Multi-Center ART Study. *PLoS One.* 2019;14: e0218555.  
497 doi:10.1371/journal.pone.0218555
- 498 10. Arnesen R, Moll AP, Shenoï S V. Predictors of loss to follow-up among patients on  
499 ART at a rural hospital in KwaZulu-Natal, South Africa. *PLoS One.* 2017;12:  
500 e0177168. doi:10.1371/journal.pone.0177168
- 501 11. Tiruneh YM, Galárraga O, Genberg B, Wilson IB. Retention in Care among HIV-  
502 Infected Adults in Ethiopia, 2005– 2011: A Mixed-Methods Study. *PLoS One.*  
503 2016;11: e0156619. doi:10.1371/journal.pone.0156619
- 504 12. Shamu T, Chimbetete C, Shawarira–Bote S, Mudzviti T, Luthy R. Outcomes of an

- 505 HIV cohort after a decade of comprehensive care at Newlands Clinic in Harare,  
506 Zimbabwe: TENART cohort. PLoS One. 2017;12: e0186726.  
507 doi:10.1371/journal.pone.0186726
- 508 13. Auld AF, Ekra KA, Shiraishi RW, Tuho MZ, Kouakou JS, Mohamed F, et al.  
509 Temporal Trends in Treatment Outcomes for HIV-1 and HIV-2-Infected Adults  
510 Enrolled in Côte d'Ivoire's National Antiretroviral Therapy Program. PLoS One.  
511 2014;9: e98183. doi:10.1371/journal.pone.0098183
- 512 14. Auld AF, Alfredo C, Macassa E, Jobarteh K, Shiraishi RW, Rivadeneira ED, et al.  
513 Temporal Trends in Patient Characteristics and Outcomes Among Children Enrolled in  
514 Mozambique's National Antiretroviral Therapy Program. *Pediatr Infect Dis J*.  
515 2015;34: e191–e199. doi:10.1097/INF.0000000000000741
- 516 15. Dalhatu I, Onotu D, Odafe S, Abiri O, Debem H, Agolory S, et al. Outcomes of  
517 Nigeria's HIV/AIDS Treatment Program for Patients Initiated on Antiretroviral  
518 Treatment between 2004-2012. PLoS One. 2016;11: e0165528.  
519 doi:10.1371/journal.pone.0165528
- 520 16. Nabukeera-Barungi N, Elyanu P, Asire B, Katureebe C, Lukabwe I, Namusoke E, et  
521 al. Adherence to antiretroviral therapy and retention in care for adolescents living with  
522 HIV from 10 districts in Uganda. *BMC Infect Dis*. 2015;15: 520. doi:10.1186/s12879-  
523 015-1265-5
- 524 17. Mutasa-Apollo T, Shiraishi RW, Takarinda KC, Dzangare J, Mugurungi O, Murungu  
525 J, et al. Patient Retention, Clinical Outcomes and Attrition-Associated Factors of HIV-  
526 Infected Patients Enrolled in Zimbabwe's National Antiretroviral Therapy Programme,  
527 2007–2010. PLoS One. 2014;9: e86305. doi:10.1371/journal.pone.0086305

- 528 18. Ministry of Health and Child Care (MoHCC). Zimbabwe ART Annual Report. 2018.
- 529 19. Tlhajoane M, Masoka T, Mpandaguta E, Rhead R, Church K, Wringe A, et al. A  
530 longitudinal review of national HIV policy and progress made in health facility  
531 implementation in Eastern Zimbabwe. *Heal Res Policy Syst.* 2018;16: 92.  
532 doi:10.1186/s12961-018-0358-1
- 533 20. Zimbabwe National Statistics Agency (ZIMSTAT). Zimbabwe National Census  
534 Report. Harare, Zimbabwe; 2012.
- 535 21. ICAP at Columbia University. Zimbabwe Population Based HIV Impact Assessment  
536 Preliminary Report. 2016.
- 537 22. National AIDS Council of Zimbabwe (NAC). Zimbabwe National HIV and AIDS  
538 Strategic Plan (ZNASP II ) 2011 - 2015. 2011;
- 539 23. Ministry of Health and Child Care (MoHCC). Zimbabwe ART Annual Report. 2015.
- 540 24. Ministry of Health and Child Care(MoHCC). An Evaluation of the Use of Point of  
541 CarePIMA CD4 Cell Count Machines for HIV Positive Women and their Families in  
542 Maternal Newborn And Child Health (MNCH) Settings in Seven Districts in  
543 Zimbabwe. 2012;
- 544 25. StataCorp. Stata Statistical Software: Release 14. College Station, TX: StataCorp LP.;  
545 2015.
- 546 26. Murray KR, Dulli LS, Ridgeway K, Dal Santo L, Darrow de Mora D, Olsen P, et al.  
547 Improving retention in HIV care among adolescents and adults in low- and middle-  
548 income countries: A systematic review of the literature. *PLoS One.* 2017;12:  
549 e0184879. doi:10.1371/journal.pone.0184879

- 550 27. Fox MP, Rosen S. Systematic review of retention of pediatric patients on HIV  
551 treatment in low and middle-income countries 2008–2013. *AIDS*. 2015;29: 493–502.  
552 doi:10.1097/QAD.0000000000000559
- 553 28. Fox MP, Rosen S. Retention of Adult Patients on Antiretroviral Therapy in Low- and  
554 Middle-Income Countries. *JAIDS J Acquir Immune Defic Syndr*. 2015;69: 98–108.  
555 doi:10.1097/QAI.0000000000000553
- 556 29. Kredo T, Ford N, Adeniyi FB, Garner P. Decentralising HIV treatment in lower- and  
557 middle-income countries. *Cochrane Database Syst Rev*. 2013;132: 383.  
558 doi:10.1002/14651858.CD009987.pub2
- 559 30. Ministry of Health and Child Care (MoHCC). ART Outcomes of People Living with  
560 HIV Enrolled in the National ART Programme, Zimbabwe, October 2012 – January  
561 2015 - Technical Report. 2016.
- 562 31. Decroo T, Panunzi I, das Dores C, Maldonado F, Biot M, Ford N, et al. Lessons  
563 learned during down referral of antiretroviral treatment in Tete, Mozambique. *J Int*  
564 *AIDS Soc*. 2009;12: 6. doi:10.1186/1758-2652-12-6
- 565 32. Zürcher K, Mooser A, Anderegg N, Tymejczyk O, Couvillon MJ, Nash D, et al.  
566 Outcomes of HIV-positive patients lost to follow-up in African treatment programmes.  
567 *Trop Med Int Heal*. 2017;22: 375–387. doi:10.1111/tmi.12843
- 568 33. Wilkinson LS, Skordis-Worrall J, Ajose O, Ford N. Self-transfer and mortality  
569 amongst adults lost to follow-up in ART programmes in low- and middle-income  
570 countries: systematic review and meta-analysis. *Trop Med Int Heal*. 2015;20: 365–379.  
571 doi:10.1111/tmi.12434
- 572 34. Cornell M, Lessells R, Fox MP, Garone DB, Giddy J, Fenner L, et al. Mortality

- 573           Among Adults Transferred and Lost to Follow-up From Antiretroviral Therapy  
574           Programmes in South Africa. *JAIDS J Acquir Immune Defic Syndr.* 2014;67: e67–  
575           e75. doi:10.1097/QAI.0000000000000269
- 576   35.   United States of America President’s Emergency Plan for AIDS Relief (PEPFAR).  
577           Loss to Follow-Up Tool: Tracking and Tracing HIV Patients [Internet]. PEPFAR Beta  
578           Solutions; 2019. Available: <https://www.pepfarsolutions.org/tools-2/2019/1/4/loss-to->  
579           follow-up-tool
- 580   36.   Egger M. Electronic medical record systems, data quality and loss to follow-up: survey  
581           of antiretroviral therapy programmes in resource-limited settings. *Bull World Health*  
582           *Organ.* 2008;86: 939–947. doi:10.2471/BLT.07.049908
- 583   37.   Ministry of Health and Child Care Zimbabwe (MoHCC). Operations and Service  
584           delivery manual for the Prevention, Care and Treatment of HIV in Zimbabwe. Harare.  
585           2015;
- 586   38.   Mills EJ, Beyrer C, Birungi J, Dybul MR. Engaging Men in Prevention and Care for  
587           HIV/AIDS in Africa. *PLoS Med.* 2012;9: e1001167.  
588           doi:10.1371/journal.pmed.1001167
- 589   39.   Koole O, Tsui S, Wabwire-Mangen F, Kwesigabo G, Menten J, Mulenga M, et al.  
590           Retention and risk factors for attrition among adults in antiretroviral treatment  
591           programmes in Tanzania, Uganda and Zambia. *Trop Med Int Heal.* 2014;19: 1397–  
592           1410. doi:10.1111/tmi.12386
- 593   40.   Brown LB, Getahun M, Ayieko J, Kwarisiima D, Owaraganise A, Atukunda M, et al.  
594           Factors predictive of successful retention in care among HIV-infected men in a  
595           universal test-and-treat setting in Uganda and Kenya: A mixed methods analysis. *PLoS*

- 596 One. 2019;14: e0210126. doi:10.1371/journal.pone.0210126
- 597 41. Ferrand RA. Attrition from HIV care among adolescents and adults in a low-income  
598 setting. *Public Heal Action*. 2016;6: 53–53. doi:10.5588/pha.16.0035
- 599 42. Matyanga CMJ, Takarinda KC, Owiti P, Mutasa-Apollo T, Mugurungi O, Buruwe L,  
600 et al. Outcomes of antiretroviral therapy among younger versus older adolescents and  
601 adults in an urban clinic, Zimbabwe. *Public Heal Action*. 2016;6: 97–104.  
602 doi:10.5588/pha.15.0077
- 603 43. Evans D, Menezes C, Mahomed K, Macdonald P, Untiedt S, Levin L, et al. Treatment  
604 Outcomes of HIV-Infected Adolescents Attending Public-Sector HIV Clinics Across  
605 Gauteng and Mpumalanga, South Africa. *AIDS Res Hum Retroviruses*. 2013;29: 892–  
606 900. doi:10.1089/aid.2012.0215
- 607 44. Zanoni BC, Sibaya T, Cairns C, Haberer JE. Barriers to Retention in Care are  
608 Overcome by Adolescent-Friendly Services for Adolescents Living with HIV in South  
609 Africa: A Qualitative Analysis. *AIDS Behav*. 2019;23: 957–965. doi:10.1007/s10461-  
610 018-2352-6
- 611 45. Murray KR, Dulli LS, Ridgeway K, Dal Santo L, Darrow de Mora D, Olsen P, et al.  
612 Improving retention in HIV care among adolescents and adults in low- and middle-  
613 income countries: A systematic review of the literature. *PLoS One*. 2017;12:  
614 e0184879. doi:10.1371/journal.pone.0184879
- 615 46. Willis N, Milanzi A, Mawodzeke M, Dziwa C, Armstrong A, Yekeye I, et al.  
616 Effectiveness of community adolescent treatment supporters (CATS) interventions in  
617 improving linkage and retention in care, adherence to ART and psychosocial well-  
618 being: a randomised trial among adolescents living with HIV in rural Zimbabwe. *BMC*

- 619 Public Health. 2019;19: 117. doi:10.1186/s12889-019-6447-4
- 620 47. Harries AD, Zachariah R, Lawn SD, Rosen S. Strategies to improve patient retention  
621 on antiretroviral therapy in sub-Saharan Africa. *Trop Med Int Heal*. 2010;15: 70–75.  
622 doi:10.1111/j.1365-3156.2010.02506.x
- 623 48. Lawn SD, Harries AD, Wood R. Strategies to reduce early morbidity and mortality in  
624 adults receiving antiretroviral therapy in resource-limited settings. *Curr Opin HIV*  
625 *AIDS*. 2010;5: 18–26. doi:10.1097/COH.0b013e328333850f
- 626 49. Marazzi MC, Liotta G, Germano P, Guidotti G, Altan AD, Ceffa S, et al. Excessive  
627 Early Mortality in the First Year of Treatment in HIV Type 1-Infected Patients  
628 Initiating Antiretroviral Therapy in Resource-Limited Settings. *AIDS Res Hum*  
629 *Retroviruses*. 2008;24: 555–560. doi:10.1089/aid.2007.0217
- 630 50. Takarinda KC, Choto RC, Mutasa-Apollo T, Chakanyuka-Musanhu C, Timire C,  
631 Harries AD. Scaling up isoniazid preventive therapy in Zimbabwe: has operational  
632 research influenced policy and practice? *Public Heal Action*. 2018;8: 218–224.  
633 doi:10.5588/pha.18.0051
- 634 51. Gonese G, Bochner AF, Makurumidze R, Apollo T, Makunike B, Meacham E, et al.  
635 Challenges in Managing Cryptococcal Meningitis in Resource-Limited Settings : A  
636 Baseline Assessment. *Abstr Accept Poster Present Int AIDS Conf 23 - 26 July 2017*.  
637 2017;
- 638 52. Mfinanga S, Chanda D, Kivuyo SL, Guinness L, Bottomley C, Simms V, et al.  
639 Cryptococcal meningitis screening and community-based early adherence support in  
640 people with advanced HIV infection starting antiretroviral therapy in Tanzania and  
641 Zambia: An open-label, randomised controlled trial. *Lancet*. 2015;385: 2173–2182.



642 doi:10.1016/S0140-6736(15)60164-7

643 53. Hakim J, Musiime V, Szubert AJ, Mallewa J, Siika A, Agutu C, et al. Enhanced  
644 Prophylaxis plus Antiretroviral Therapy for Advanced HIV Infection in Africa. *N Engl*  
645 *J Med*. 2017;377: 233–245. doi:10.1056/NEJMoa1615822

646 54. Benzekri NA, Sambou JF, Ndong S, Tamba IT, Faye D, Diallo MB, et al. Prevalence,  
647 predictors, and management of advanced HIV disease among individuals initiating  
648 ART in Senegal, West Africa. *BMC Infect Dis*. 2019;19: 261. doi:10.1186/s12879-  
649 019-3826-5

650 55. Bigna JJR, Plottel CS, Koulla-shiro S. Challenges in initiating antiretroviral therapy  
651 for all HIV-infected people regardless of CD4 cell count. *Infect Dis Poverty*. 2016; 1–  
652 6. doi:10.1186/s40249-016-0179-9

653

Targeted number of records to be abstracted

4000

Actual number records abstracted

3993

Number of records finally analysed

3810

7 records were not reviewed

183 records dropped

- Patients enrolled before 1 October 2012
- Patients enrolled after 31 January 2015
- ART start date missing
- Last visit/outcome date missing
- Patients in care for less than 6 months

Figure

bioRxiv preprint doi: <https://doi.org/10.1101/750232>; this version posted August 28, 2019. The copyright holder for this preprint (which was not certified by peer review) is the author/funder, who has granted bioRxiv a license to display the preprint in perpetuity. It is made available under aCC-BY 4.0 International license.

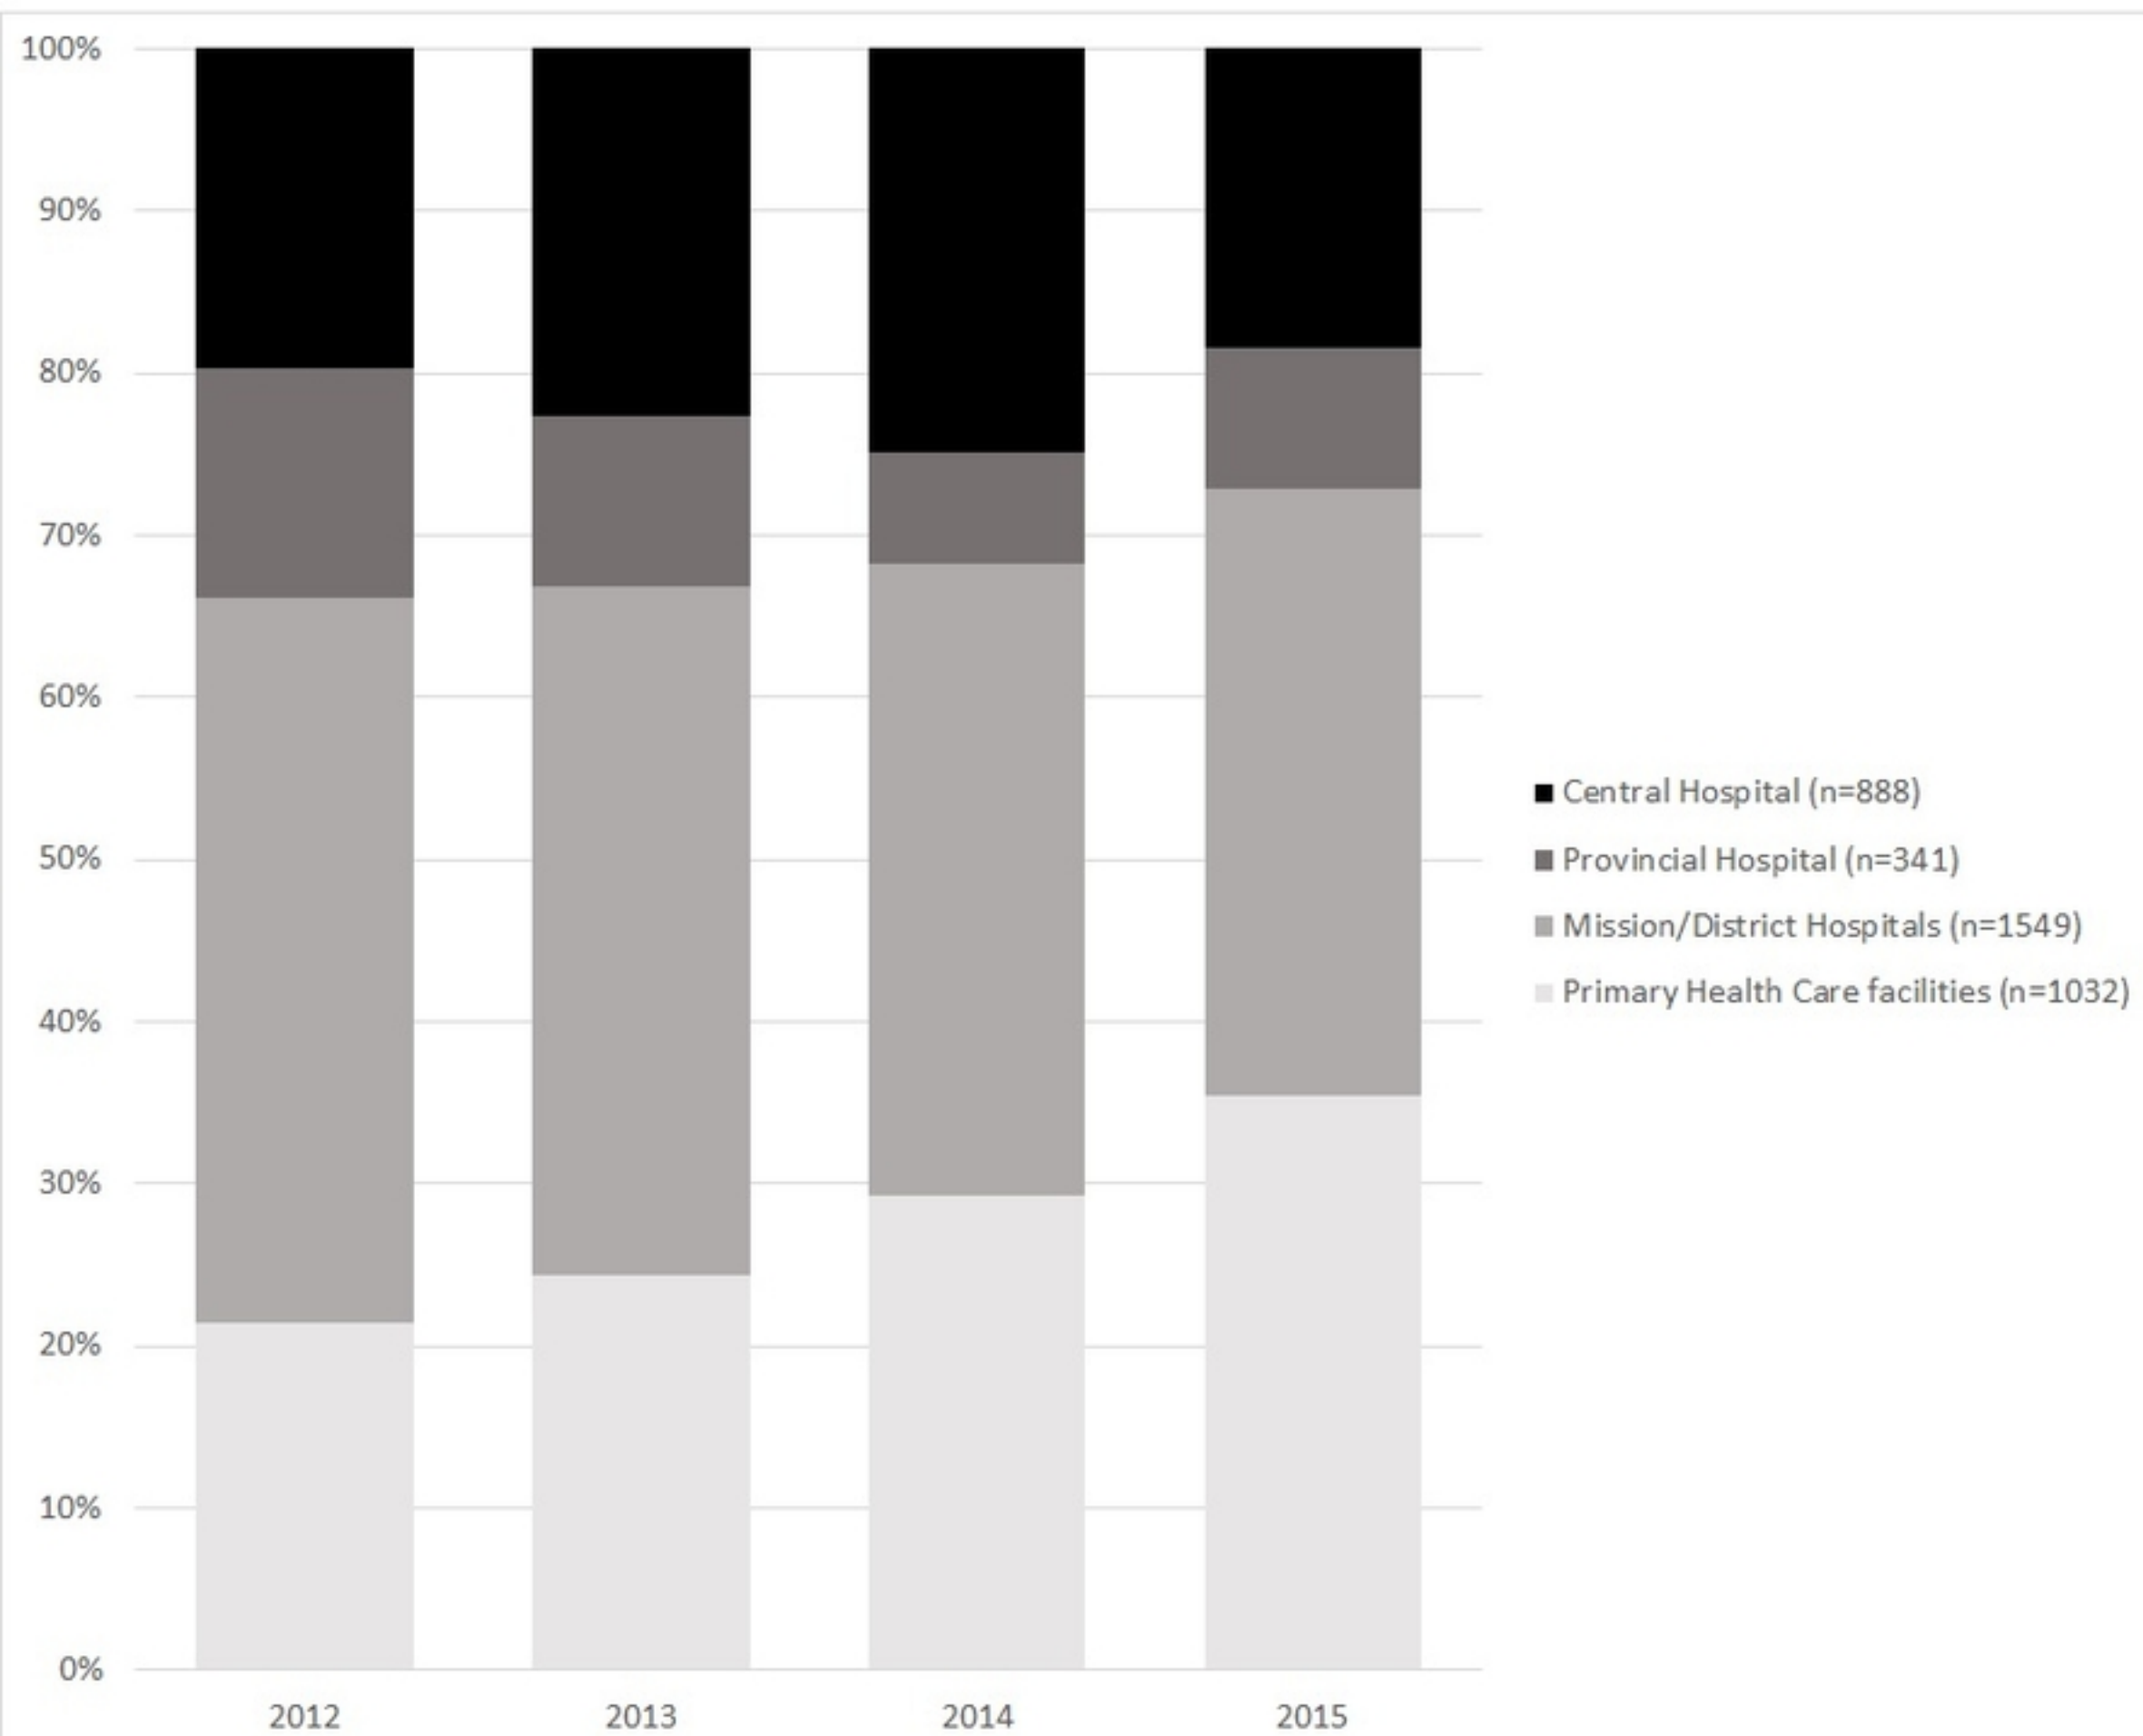

Figure

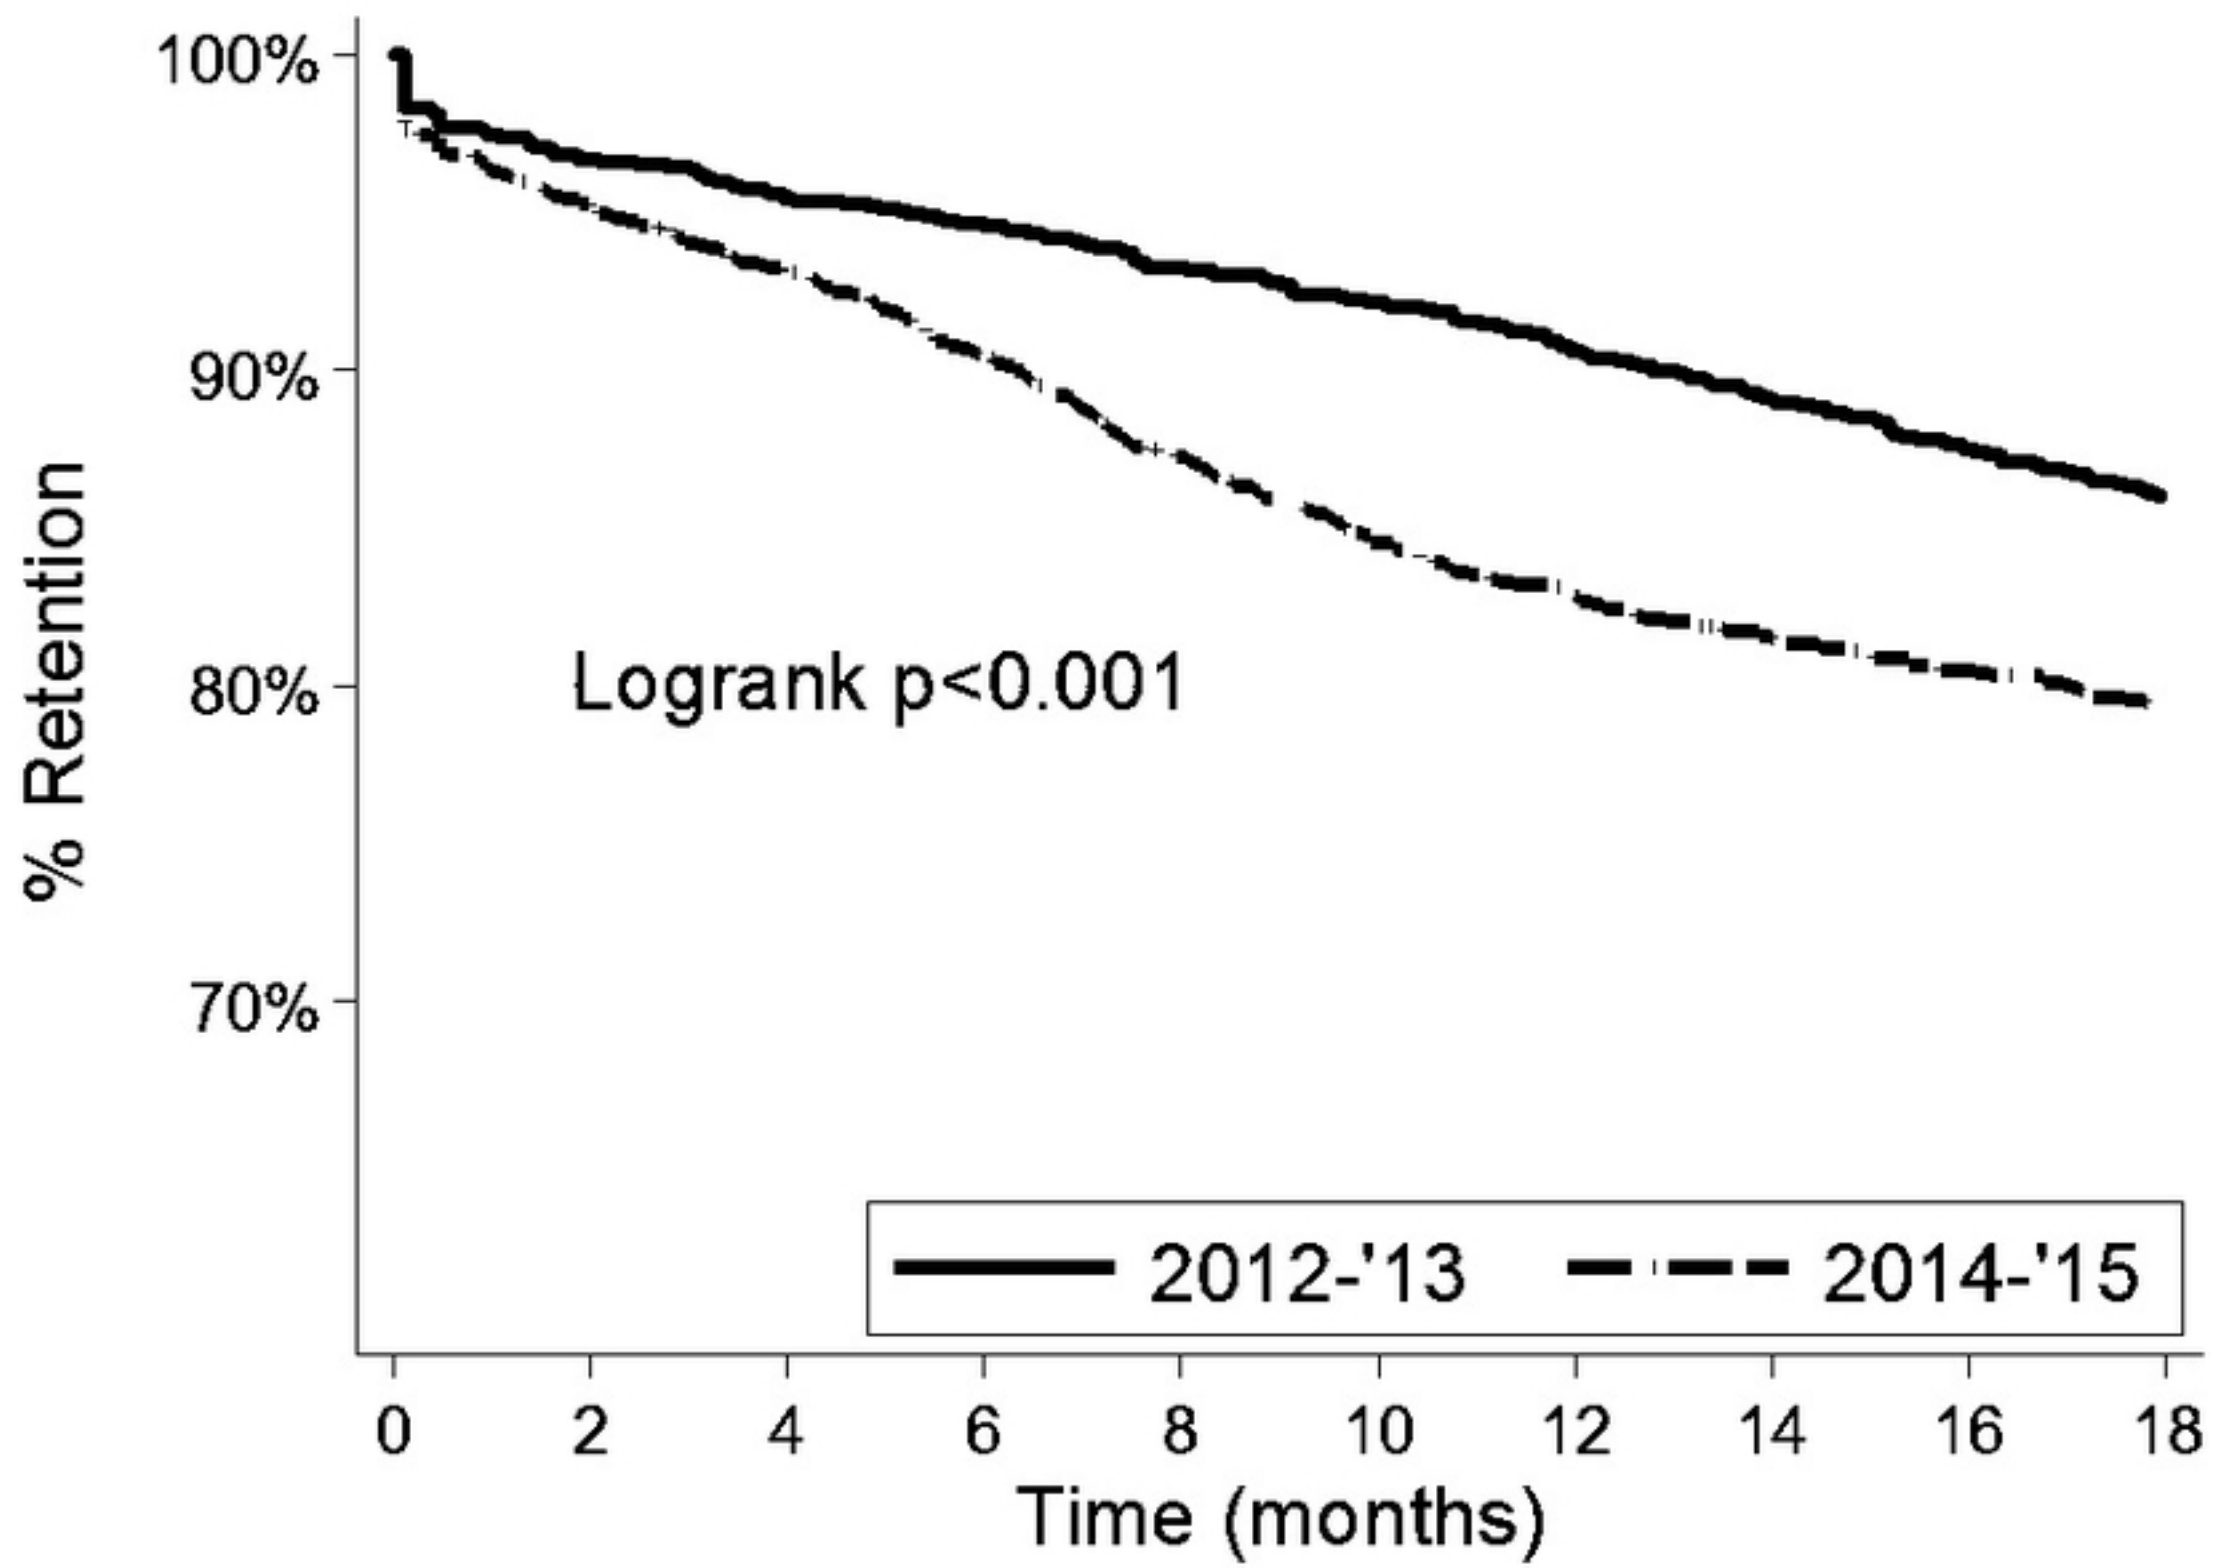

Figure
